# Supplementary material for: Abelmoschus esculentus fractions potently inhibited the pathogenic targets associated with diabetic renal epithelial to mesenchymal transition
Source: Royal Society of Chemistry journal article supplement (doi:10.1039/c5fo01214g), 2016-01-01
Supplement: c5fo01214g1.pdf [file c5fo01214g1.pdf]

S1 Effect of quercetin compounds (isolated from F1) on the expressions of vimentin, AT-1, and DPP-4 activity. AEQE: *Abelmoschus esculentus* quercetin extract.

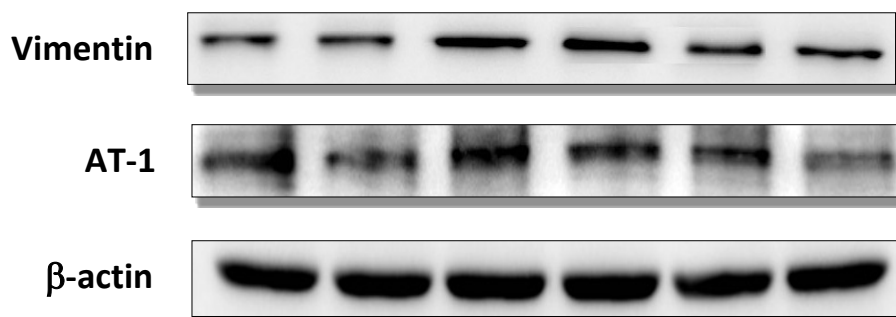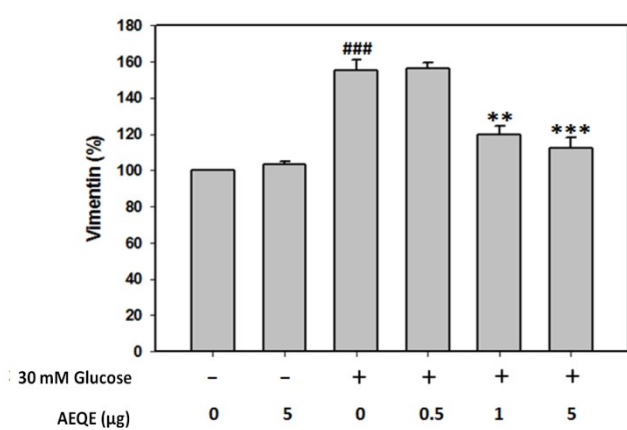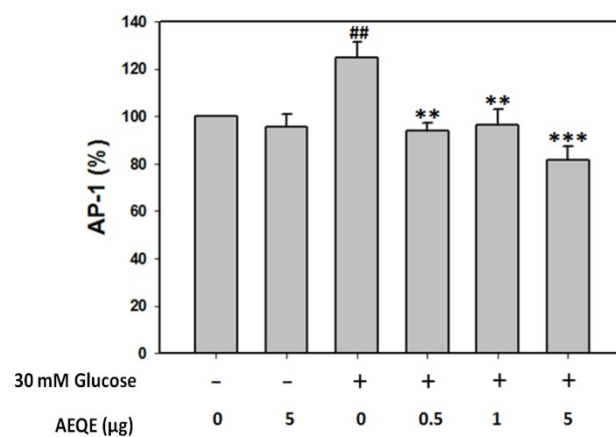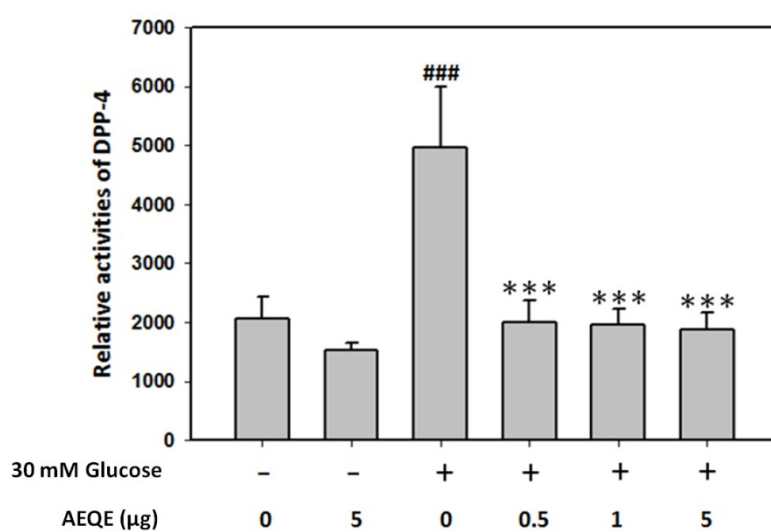

S2 Amino acid composition of AE.

| <b>Amino acid (wt%)</b> | <b>AE</b> |
|-------------------------|-----------|
| Ala                     | 16.38     |
| Gly                     | 10.47     |
| Val                     | 7.66      |
| Leu                     | 36.18     |
| Ile                     | 6.51      |
| Pro                     | 9.56      |
| Met                     | 0.77      |
| Glu                     | 0.29      |
| Hyp                     | 7.79      |
| Phe                     | 0.53      |
| Cys                     | 1.54      |
| Lys                     | 0.61      |
| Tyr                     | 0.16      |
| Asp                     | 0.76      |
| His                     | 0.79      |
